# Supplementary material for: The effect of short-graft preparation with tape suspension and screw fixation on loss of knee extension following anterior cruciate ligament reconstruction: A retrospective cross-sectional analysis of public hospital cases from 2015 - 2017
Source: bioRxiv or medRxiv preprint supplement (doi:10.1101/2020.04.21.20073494), 2022-04-21
Supplement: Supplementary file [file media-1.pdf]

## Supplementary material

**Supplementary table:** Variables included in regression model

| Variable                      | Definition                                                                                               | Responses                                                                                       | Component of model      |
|-------------------------------|----------------------------------------------------------------------------------------------------------|-------------------------------------------------------------------------------------------------|-------------------------|
| Patient ID                    | Unique identifier                                                                                        | ID, URN, MRN                                                                                    | Model random factor     |
| Age                           | Age at time of surgery                                                                                   | years                                                                                           | Model covariate         |
| Gender                        | As identified by the patient                                                                             | Male; Female; Not specified                                                                     | Model covariate         |
| BMI                           | Body mass index as per standard formula                                                                  | kg/(m <sup>2</sup> )                                                                            | Model covariate         |
| Secondary diagnosis           | Injuries to other knee structures                                                                        | meniscus (lateral/medial); cartilage (femoral/tibial/patella); ligament (collateral/PCL); other | Model covariate         |
| DateofInjury to DateofSurgery | Time delay between when the injury occurred and when surgery is performed                                | Weeks                                                                                           | Model covariate         |
| Timepoint                     | Post-surgery delay of measurement of maximum knee flexion                                                | Initial<br>Maximum                                                                              | Model covariate         |
| SGTS                          | Was a SGTS system used?                                                                                  | Yes; No                                                                                         | Model primary predictor |
| Maximum extension             | Minimum flexion angle under passive loading forcing the knee into extension. Relative to anatomical zero | Degrees                                                                                         | Model primary outcome   |

## Supplementary data: Regression model code (STATA)

```
1 import delimited "Filepath MasterSheet.csv", stringcols(1)
2
3 *Swap Filepath for local filepath
4
5 // Mixed effects logistic regression as per DAG figure (adjusted variables as covariates) (updated
6 // Sept 2021)
7
8 * encode categorical variables
9 label define sexcode 0 "Male" 1 "Female", replace
10 encode sex, gen(sexcode)
11 encode secondary, gen(secondcode)
12 label define sgtscode 0 "No" 1 "Yes", replace
13 encode sgts, gen(sgtscode)
14 label define timecode 0 "Initial" 1 "Maximum", replace
15 encode timepoint, gen(timecode)
16 label define loecode 0 "No" 1 "Yes", replace
17 encode loestatus, gen(loecode)
18 label define notchcode 0 "No" 1 "Yes", replace
19 encode notchplasty, gen(notchcode)
20 encode secmed, gen(secmedcode)
21 encode seclat, gen (seclatcode)
22 encode secother, gen(othercode)
23 encode presromrest, gen(presromcode)
24
25 *Check missing pattern of key variables
26 misstable summarize, all
27 misstable patterns ageatsurgery sexcode secondcode dos_physio bmi sgtscode timecode
28
29 *Sort data to summarize
30 sort timecode
31
32 *Create table summary by timepoint
33 *by timecode: summarize, separator(4)
34 table sgtscode notchcode, statistic (count notchcode)
35
36 table sgtscode, statistic(count ageatsurgery bmi dos_physio doi_dos initial_max)
37 table sgtscode, statistic(median ageatsurgery bmi dos_physio doi_dos initial_max)
38 table sgtscode, statistic(q1 ageatsurgery bmi dos_physio doi_dos initial_max)
39 table sgtscode, statistic(q3 ageatsurgery bmi dos_physio doi_dos initial_max)
40
41 *Set and perform melogit
42
43 *label define loecode 0 "No" 1 "Yes", replace
44 melogit loecode i.sgtscode#i.timecode c.ageatsurgery c.secondcode c.bmi i.sexcode c.doi_dos, ||
45 patientid:
46 // Calculated proportions for sgtscode
47 margins sgtscode
48 // Calculated proportions for sgtscode
49 margins sgtscode#timecode
50 // Calculate differences in proportions between TLS levels (Yes vs No)
51 margins ar.sgtscode
52 // Calculate proportions for sgtscode##timecode
53 margins ar.sgtscode@timecode
54
55 save "Filepath Analysis - First Pass.dta", replace
56 *Swap Filepath for local filepath
```
