# Supplementary material for: The effect of short-graft preparation with tape suspension and screw fixation on loss of knee extension following anterior cruciate ligament reconstruction: A retrospective cross-sectional analysis of public hospital cases from 2015 - 2017
Source: bioRxiv or medRxiv preprint supplement (doi:10.1101/2020.04.21.20073494), 2022-04-21
Supplement: Supplementary file [file media-2.pdf]

|                           | Item No | Recommendation                                                                                                                                                                                                                                                                                                                                                                                                                                 | Yes/no | Page    |
|---------------------------|---------|------------------------------------------------------------------------------------------------------------------------------------------------------------------------------------------------------------------------------------------------------------------------------------------------------------------------------------------------------------------------------------------------------------------------------------------------|--------|---------|
| <b>Title and abstract</b> | 1       | (a) Indicate the study's design with a commonly used term in the title or the abstract                                                                                                                                                                                                                                                                                                                                                         | Yes    | 1       |
|                           |         | (b) Provide in the abstract an informative and balanced summary of what was done and what was found                                                                                                                                                                                                                                                                                                                                            | Yes    | 1-2     |
| <b>Introduction</b>       |         |                                                                                                                                                                                                                                                                                                                                                                                                                                                |        |         |
| Background/rationale      | 2       | Explain the scientific background and rationale for the investigation being reported                                                                                                                                                                                                                                                                                                                                                           | Yes    | 3-4     |
| Objectives                | 3       | State specific objectives, including any prespecified hypotheses                                                                                                                                                                                                                                                                                                                                                                               | Yes    | 4       |
| <b>Methods</b>            |         |                                                                                                                                                                                                                                                                                                                                                                                                                                                |        |         |
| Study design              | 4       | Present key elements of study design early in the paper                                                                                                                                                                                                                                                                                                                                                                                        | Yes    | 5       |
| Setting                   | 5       | Describe the setting, locations, and relevant dates, including periods of recruitment, exposure, follow-up, and data collection                                                                                                                                                                                                                                                                                                                | Yes    | 5       |
| Participants              | 6       | (a) Cohort study—Give the eligibility criteria, and the sources and methods of selection of participants. Describe methods of follow-up<br>Case-control study—Give the eligibility criteria, and the sources and methods of case ascertainment and control selection. Give the rationale for the choice of cases and controls<br>Cross-sectional study—Give the eligibility criteria, and the sources and methods of selection of participants | Yes    | 5-6     |
|                           |         | (b) Cohort study—For matched studies, give matching criteria and number of exposed and unexposed<br>Case-control study—For matched studies, give matching criteria and the number of controls per case                                                                                                                                                                                                                                         | NA     |         |
| Variables                 | 7       | Clearly define all outcomes, exposures, predictors, potential confounders, and effect modifiers. Give diagnostic criteria, if applicable                                                                                                                                                                                                                                                                                                       | Yes    | 6-8     |
| Data sources/ measurement | 8*      | <b>For each variable of interest, give sources of data and details of methods of assessment (measurement). Describe comparability of assessment methods if there is more than one group</b>                                                                                                                                                                                                                                                    | Yes    | 7-8     |
| Bias                      | 9       | Describe any efforts to address potential sources of bias                                                                                                                                                                                                                                                                                                                                                                                      | Yes    | 8       |
| Study size                | 10      | Explain how the study size was arrived at                                                                                                                                                                                                                                                                                                                                                                                                      | Yes    | 8       |
| Quantitative variables    | 11      | Explain how quantitative variables were handled in the analyses. If applicable, describe which groupings were chosen and why                                                                                                                                                                                                                                                                                                                   | Yes    | 9-10    |
| Statistical methods       | 12      | (a) Describe all statistical methods, including those used to control for confounding                                                                                                                                                                                                                                                                                                                                                          | Yes    | 9-10    |
|                           |         | (b) Describe any methods used to examine subgroups and interactions                                                                                                                                                                                                                                                                                                                                                                            |        |         |
|                           |         | (c) Explain how missing data were addressed                                                                                                                                                                                                                                                                                                                                                                                                    | Yes    | 8-9     |
|                           |         | (d) Cohort study—If applicable, explain how loss to follow-up was addressed<br>Case-control study—If applicable, explain how matching of cases and controls was addressed<br>Cross-sectional study—If applicable, describe analytical methods taking account of sampling strategy                                                                                                                                                              | Yes    | 10      |
|                           |         | (e) Describe any sensitivity analyses                                                                                                                                                                                                                                                                                                                                                                                                          | NA     |         |
| <b>Results</b>            |         |                                                                                                                                                                                                                                                                                                                                                                                                                                                |        |         |
| Participants              | 13*     | (a) Report numbers of individuals at each stage of study—eg numbers potentially eligible, examined for eligibility, confirmed eligible, included in the study, completing follow-up, and analysed                                                                                                                                                                                                                                              | Yes    | 12      |
|                           |         | (b) Give reasons for non-participation at each stage                                                                                                                                                                                                                                                                                                                                                                                           | Yes    | 12      |
|                           |         | (c) Consider use of a flow diagram                                                                                                                                                                                                                                                                                                                                                                                                             | Yes    | 12      |
| Descriptive data          | 14*     | (a) Give characteristics of study participants (eg demographic, clinical, social) and information on exposures and potential confounders                                                                                                                                                                                                                                                                                                       | Yes    | Table 1 |
|                           |         | (b) Indicate number of participants with missing data for each variable of interest                                                                                                                                                                                                                                                                                                                                                            | Yes    | 13      |
|                           |         | (c) Cohort study—Summarise follow-up time (eg, average and total amount)                                                                                                                                                                                                                                                                                                                                                                       | Yes    | 13      |
| Outcome data              | 15*     | <i>Cohort study—Report numbers of outcome events or summary measures over time</i>                                                                                                                                                                                                                                                                                                                                                             | Yes    | 14      |
|                           |         | <i>Case-control study—Report numbers in each exposure category, or summary measures of exposure</i>                                                                                                                                                                                                                                                                                                                                            | NA     |         |
|                           |         | <i>Cross-sectional study—Report numbers of outcome events or summary measures</i>                                                                                                                                                                                                                                                                                                                                                              | NA     |         |
| Main results              | 16      | (a) Give unadjusted estimates and, if applicable, confounder-adjusted estimates and their precision (eg, 95% confidence interval). Make clear which confounders were adjusted for and why they were included                                                                                                                                                                                                                                   | Yes    | 13-14   |
|                           |         | (b) Report category boundaries when continuous variables were categorized                                                                                                                                                                                                                                                                                                                                                                      | NA     |         |
|                           |         | (c) If relevant, consider translating estimates of relative risk into absolute risk for a meaningful time period                                                                                                                                                                                                                                                                                                                               | NA     |         |
| Other analyses            | 17      | Report other analyses done—eg analyses of subgroups and interactions, and sensitivity analyses                                                                                                                                                                                                                                                                                                                                                 | NA     |         |
| <b>Discussion</b>         |         |                                                                                                                                                                                                                                                                                                                                                                                                                                                |        |         |
| Key results               | 18      | Summarise key results with reference to study objectives                                                                                                                                                                                                                                                                                                                                                                                       | Yes    | 15-17   |
| Limitations               | 19      | Discuss limitations of the study, taking into account sources of potential bias or imprecision. Discuss both direction and magnitude of any potential bias                                                                                                                                                                                                                                                                                     | Yes    | 17      |
| Interpretation            | 20      | Give a cautious overall interpretation of results considering objectives, limitations, multiplicity of analyses, results from similar studies, and other relevant evidence                                                                                                                                                                                                                                                                     | Yes    | 17-18   |
| Generalisability          | 21      | Discuss the generalisability (external validity) of the study results                                                                                                                                                                                                                                                                                                                                                                          | Yes    | 17      |
| <b>Other information</b>  |         |                                                                                                                                                                                                                                                                                                                                                                                                                                                |        |         |
| Funding                   | 22      | Give the source of funding and the role of the funders for the present study and, if applicable, for the original study on which the present article is based                                                                                                                                                                                                                                                                                  | NA     |         |
